# Supplementary material
Source: PubMed Central journal article supplement (PMC2754676)
Supplement: en.2008-1648_1.pdf [file en.2008-1648_1.pdf]

### Antibodies

| Antibody  | Source          | Cat. number | Diluted | Concentration 1:1 | Host              | Species reactivity        |
|-----------|-----------------|-------------|---------|-------------------|-------------------|---------------------------|
| IGF-I     | Lab Vision      | rb-9240     | 1:50    | 200ug/ml          | rabbit polyclonal | human, mouse, rat         |
| IGF-R1    | Chemicon        | MAB1120     | 1:50    | 200ug/ml          | mouse monoclonal  | human. Weakly with rabbit |
| IGF-II    | RD              | AF-292-NA   | 1-500   | 250ug/ml          | goat polyclonal   | human                     |
| IGF-R2    | Santa Cruz      | sc-14410    | 1:50    | 200ug/ml          | goat polyclonal   | human                     |
| IGFBP1    | Santa Cruz      | sc-6000     | 1-100   | 200ug/ml          | goat polyclonal   | human, mouse, rat         |
| IGFBP3    | Santa Cruz      | sc-9028     | 1-250   | 200ug/ml          | rabbit polyclonal | human                     |
| Ki67      | Visionbiosystes | ki67-MM1-CE | 1-200   | 80mg/ml           | mouse monoclonal  | Human, mouse, rat         |
| AKT       | Cell Signaling  | 4685        | 1-50    | 23.5mg/ml         | Rabbit monoclonal | Human, mouse, rat, monkey |
| Caspase-3 | Cell Signaling  | 9664        | 1-100   | 83.3ug/ml         | rabbit monoclonal | human ,mouse ,rat         |

### S<sup>35</sup> Riboprobe

| cDNA   | Plasmid             | Sense or Anti-Sense | Restriction Enzyme | Promoter | Size (bp) | Source                                           |
|--------|---------------------|---------------------|--------------------|----------|-----------|--------------------------------------------------|
| IGF-I  | pGEM-T              | AS                  | Hind III           | T7       | 773       | donated by Martin Jansen                         |
| IGF-I  | pGEM-T              | S                   | EcoR 1             | SP6      | 773       |                                                  |
| IGF-R1 | pBlueScript II SKII | AS                  | Kpn 1              | T7       | 1462      | donation of Sam Casella,                         |
| IGF-R1 | pBlueScript II SKII | S                   | EcoR 1             | T3       | 1462      |                                                  |
| IGF-II | pGEM4Z              | AS                  | Xba I              | T7       | 807       | donated by Martin Jansen                         |
| IGF-II | pGEM4Z              | S                   | Xba I              | T7       | 807       |                                                  |
| IGF-R2 | pGEM-T              | AS                  | Sac II             | Sp-6     | 354       | produced in Victor Han's lab by Dr. Marek Zygunt |
| IGF-R2 | pGEM-T              | S                   | Pst I              | T7       | 354       |                                                  |
| IGFBP1 | pBluescript SK+     | AS                  | Hind III           | T3       | 350       | donation of Sunichi Shimasaki                    |
| IGFBP1 | pBluescript SK+     | S                   | EcoR 1             | T7       | 350       |                                                  |
| IGFBP3 | pHBP-502            | AS                  | Hind III           | T3       | 475       | donation of Sunichi Shimasaki                    |
| IGFBP3 | pHBP-502            | S                   | EcoR 1             | T7       | 475       |                                                  |
